# Supplementary material for: Itaconate enhances oncolytic virotherapy by multitarget inhibition of antiviral and inflammatory pathways
Source: Research Square preprint supplement (doi:10.21203/rs.3.rs-3035315/v1), 2023-06-09
Supplement: Supplementary file 1 [file b792cfcd69b46c958e2db7ec.pdf]

**Table S1.** Patient characteristics of colorectal cancer organoids used in this study

| No  | Biobank ID (*) | Age | Sex    | MMR status (**) | Tumor localization | UICC Classification | Prior Radiation Therapy | Prior Chemotherapy | Normal organoids tested |
|-----|----------------|-----|--------|-----------------|--------------------|---------------------|-------------------------|--------------------|-------------------------|
| P1  | <b>O17</b>     | 78  | male   | MMRp            | colon sigmoideum   | IIIC                | -                       | -                  | +                       |
| P2  | <b>O11</b>     | 69  | male   | MMRp            | colon sigmoideum   | I                   | -                       | -                  | -                       |
| P3  | <b>O23</b>     | 59  | male   | MMRp            | rectum             | IIIB                | +                       | +                  | -                       |
| P4  | <b>O29</b>     | 79  | male   | MMRp            | colon descendens   | IIIB                | -                       | +                  | -                       |
| P5  | <b>O06</b>     | 38  | female | MMRp            | colon sigmoideum   | IIIA                | -                       | -                  | +                       |
| P6  | <b>O28</b>     | 68  | male   | MMRp            | flexura hepatica   | IVC                 | -                       | -                  | +                       |
| P7  | <b>O09</b>     | 54  | male   | MMRp            | rectum             | IIIB                | +                       | +                  | -                       |
| P8  | <b>O13</b>     | 76  | male   | MMRp            | colon descendens   | IVB                 | +                       | +                  | -                       |
| P9  | <b>O24</b>     | 55  | male   | MMRp            | rectum             | IVA                 | -                       | +                  | -                       |
| P10 | <b>O07</b>     | 74  | female | MMRd            | caecum             | IVB                 | -                       | -                  | -                       |
| P11 | <b>O02</b>     | 78  | male   | MMRd            | colon ascendens    | IIA                 | -                       | -                  | -                       |
| P12 | <b>O14</b>     | 46  | male   | MMRp            | rectum             | I                   | -                       | -                  | -                       |

(\*) part of the CRC organoid-stroma biobank (*under review*)

(\*\*) organoids with >1000 somatic alterations detected by whole exome sequencing were defined as mismatch repair deficient (dMMR)

**Table S2.** Clinical data from all brain tumor patients

| ID | Age<br>(Years) | Sex    | Tumor<br>localization | Diagnosis                                               |
|----|----------------|--------|-----------------------|---------------------------------------------------------|
| P1 | 78             | Female | Left, occipital       | Metastasis, malignant<br>melanoma                       |
| P2 | 75             | Male   | Left, frontal         | Newly diagnosed GBM, IDH-<br>wt (WHO IV)                |
| P3 | 60             | Male   | Right,<br>parietal    | Recurrent GBM, IDH-wt<br>(WHO IV),<br>radiochemotherapy |

**Table S3.** Binding energies of 4-OI to different cysteine-containing sites in human IKK $\beta$

| Binding site | IKK $\beta$ Binding energy score (S) (kcal/mol) |
|--------------|-------------------------------------------------|
| Cys12        | −6.8 to −7.6                                    |
| Cys179       | −7.0 to −8.1                                    |
| Cys412       | −8.2 to −10.0                                   |
| Cys464       | −7.7 to −9.0                                    |
| Cys524       | −6.5 to −7.1                                    |
| Cys716       | −5.1 to −5.7                                    |
